# Supplementary material for: Interfacial engineering of Ni–Co–Mn@Ni nanosheet–nanocone arrays as high performance non-noble metal electrocatalysts for hydrogen generation
Source: Royal Society of Chemistry journal article supplement (doi:10.1039/d4nr01404a), 2024-01-01
Supplement: d4nr01404a2.pdf [file d4nr01404a2.pdf]

**Supporting information for**

**Interfacial Engineering of Ni-Co-Mn@Ni Nanosheets-Nanocones Arrays for High performance Non-Noble Metal Electrocatalyst for Hydrogen Generation.**

Mostafa Nazemi<sup>a</sup>, Ghasem Barati Darband<sup>a\*</sup>, Ali Davoodi<sup>b</sup>

a- Materials and Metallurgical Engineering Department, Faculty of Engineering, Ferdowsi

University of Mashhad, Mashhad 91775-1111, Iran

b- Amsterdam science park, PC1098X, Netherlands

Corresponding author: (Ghasem Barati Darband: baratidarband@um.ac.ir)

**Table S1.** Chemical composition of electrodeposition baths

| Component                            | NNCs Bath (mol.lit <sup>-1</sup> ) | NCMNSs Bath (mol.lit <sup>-1</sup> ) |
|--------------------------------------|------------------------------------|--------------------------------------|
| NiCl <sub>2</sub> .6H <sub>2</sub> O | 1                                  | 0.01                                 |
| NH <sub>3</sub>                      | 2                                  | -                                    |
| NH <sub>4</sub> Cl                   | 3                                  | -                                    |
| CoCl <sub>2</sub> .6H <sub>2</sub> O | -                                  | 0.01                                 |
| MnCl <sub>2</sub> .4H <sub>2</sub> O | -                                  | 0.01                                 |

**Table S2.** Cyclic electrodeposition parameters and samples names

| Sample Name | number of cycles | scan rate (mV.s <sup>-1</sup> ) |
|-------------|------------------|---------------------------------|
| 1C-S10      | 1                | 10                              |
| 3C-S10      | 3                | 10                              |
| 5C-S10      | 5                | 10                              |
| 10C-S10     | 10               | 10                              |
| 3C-S20      | 3                | 20                              |
| 3C-S50      | 3                | 50                              |
| 3C-S80      | 3                | 80                              |

**Table S3.**  $C_{dl}$  and ECSA extracted from CV curves

| Parameter                       | C1   | C3   | C5   | C10  | S20  | S50 | S80 | NiCo |
|---------------------------------|------|------|------|------|------|-----|-----|------|
| $C_{dl}$ (mF.cm <sup>-2</sup> ) | 55.3 | 60.9 | 57   | 41.9 | 59.8 | 3.1 | 0.7 | 58.2 |
| ECSA (cm <sup>2</sup> )         | 2765 | 3045 | 2850 | 2095 | 2990 | 155 | 35  | 2910 |

**Table S4.** Tafel slope for each step of HER

| Step      | Tafel Slope (mV.dec <sup>-1</sup> ) |
|-----------|-------------------------------------|
| Volmer    | 120                                 |
| Heyrovsky | 40                                  |
| Tafel     | 30                                  |

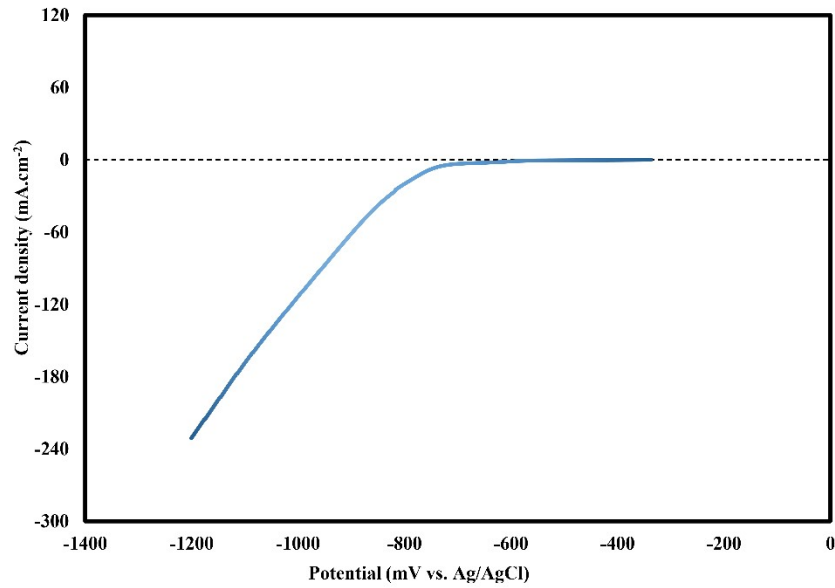

**Figure S1.** LSV curve of NF in first deposition bath

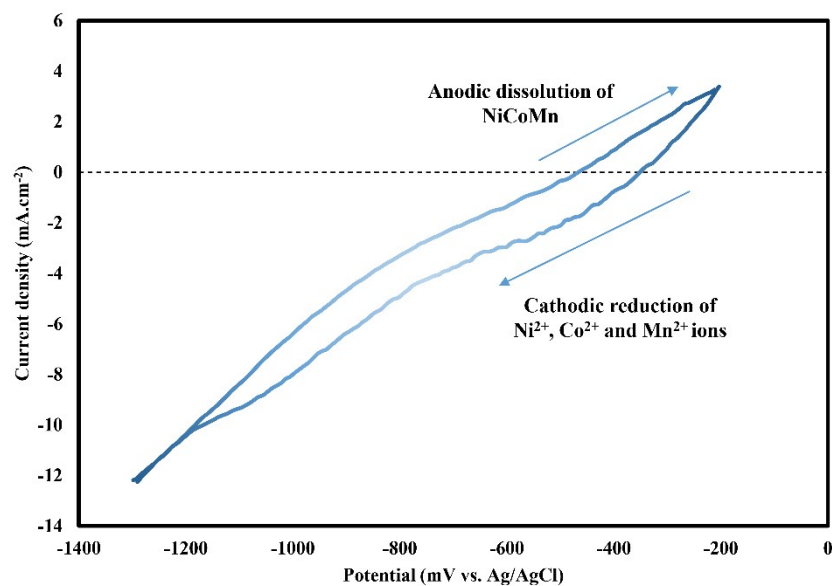

**Figure S2.** Cyclic voltammetry electrodeposition of NiCoMn nanosheets at 50 mV.s<sup>-1</sup> sweep rate

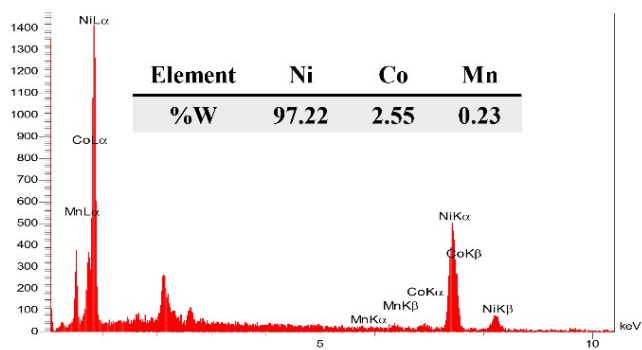

**Figure S3.** EDX results and corresponding weight percentages of C3-S80

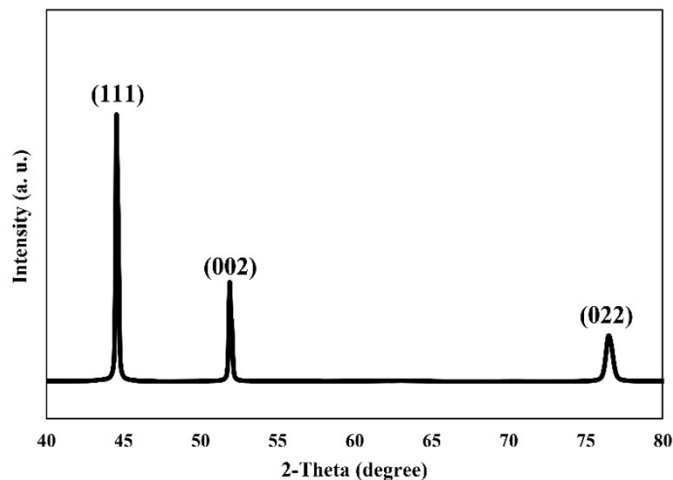

**Figure S4.** XRD pattern of C3-S10 sample ((Reference code: 96-432-0487))

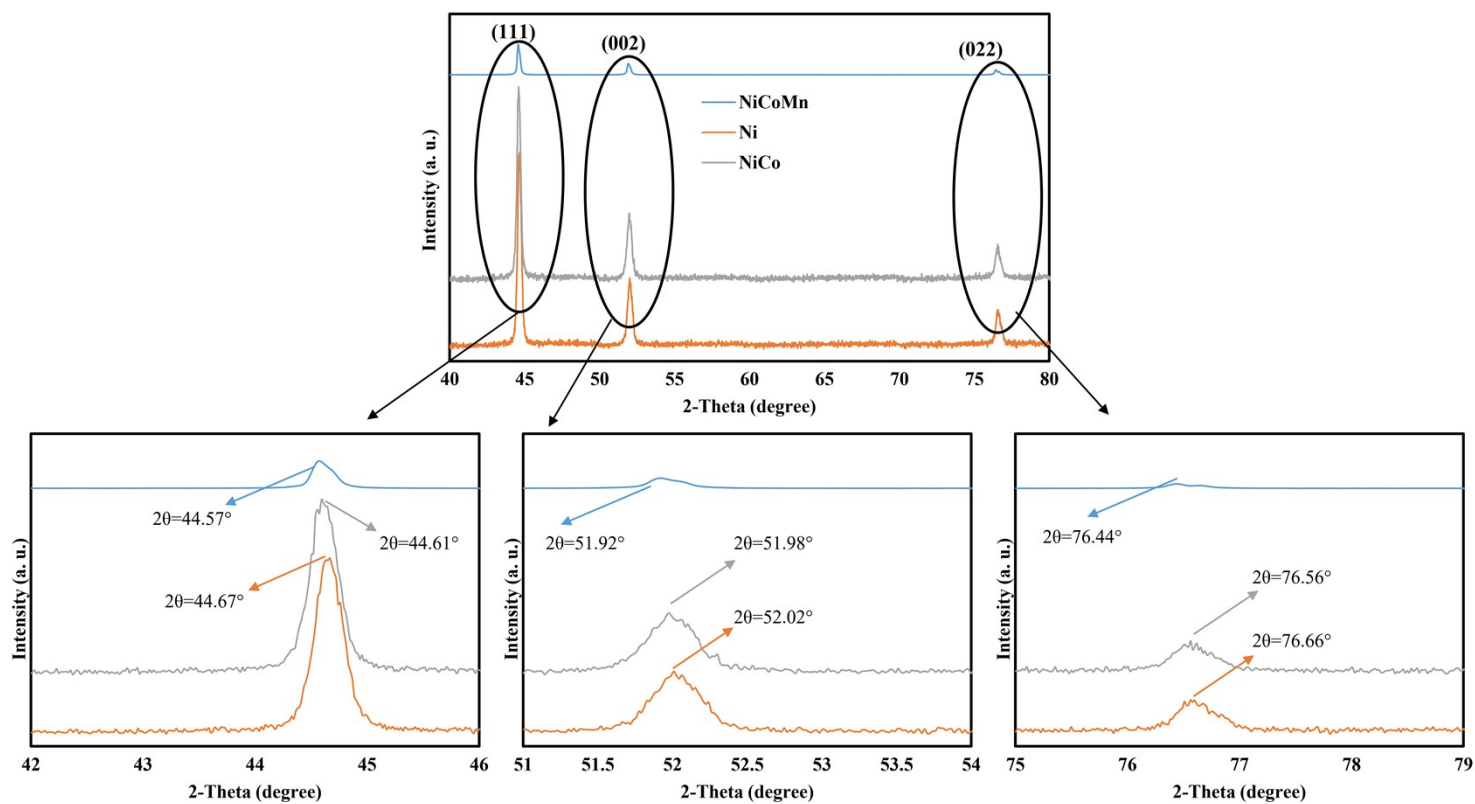

**Figure S5;** XRD patterns of different stages: NNCs, NiCo and NiCoMn (Reference code: 96-432-0487)

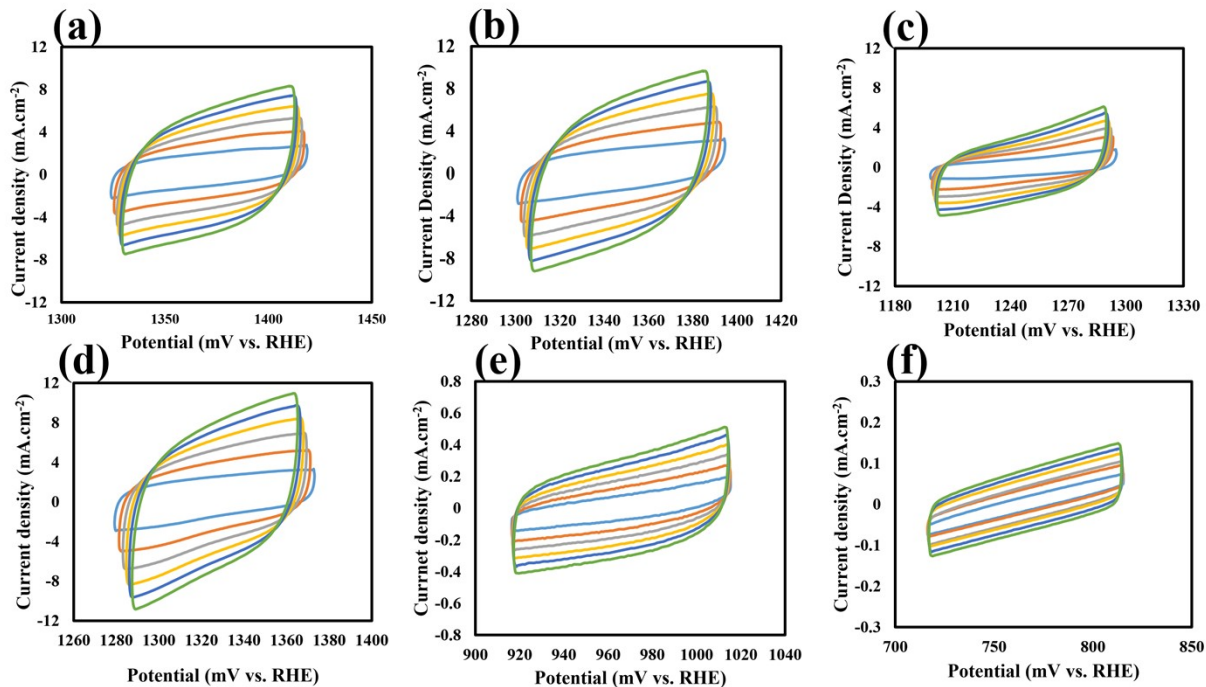

**Figure S6.** CV curves in different sweep rates for ECSA measurements of a) C1-S10 b) C5-S10 c) C10-S10 d) C3-S20 e) C3-S50 and f) C3-S80, respectively

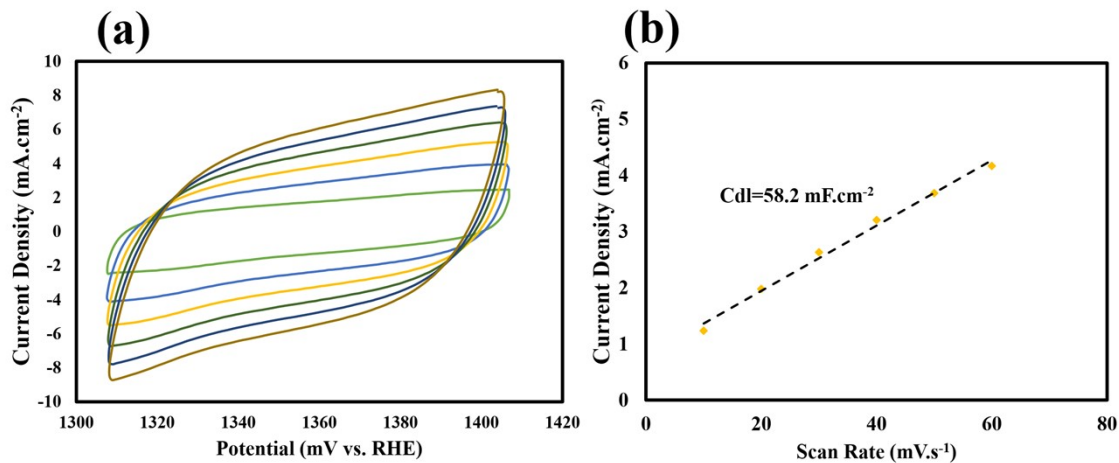

**Figure S7.** a) CV curves in different sweep rates for ECSA measurement and b) linear plot for Cdl extraction of NiCo sample

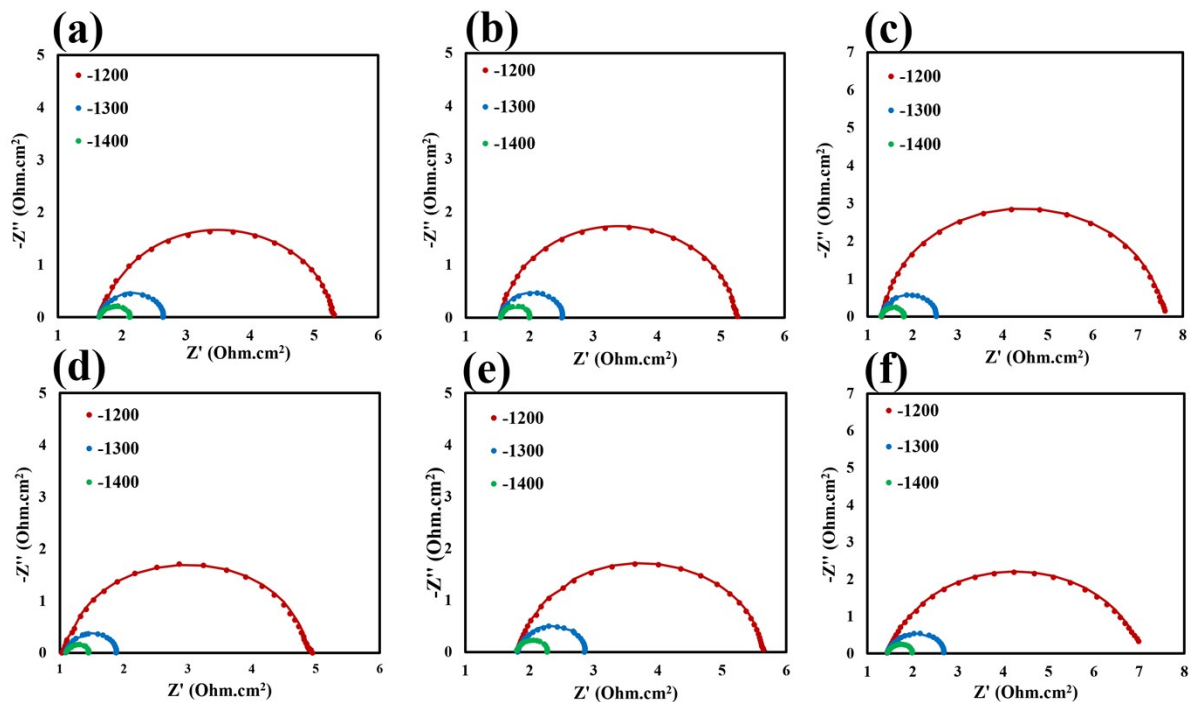

**Figure S8.** Nyquist plots of a) C1-S10, b) C5-S10, c) C10-S10, d) C3-S20, e) C3-S50 and f) NNCs substrate, respectively

**TableS5.** Electrochemical parameters determined from Nyquist plots

| Sample  | -1200 |        |          |          | -1300 |        |          |          | -1400 |         |          |          |
|---------|-------|--------|----------|----------|-------|--------|----------|----------|-------|---------|----------|----------|
|         | $R_s$ | CPE    | n        | $R_{CT}$ | $R_s$ | CPE    | n        | $R_{CT}$ | $R_s$ | CPE     | n        | $R_{CT}$ |
| NNCs    | 1.431 | 5.419m | 843.007m | 5.666    | 1.429 | 2.968m | 894.5m   | 1.266    | 1.442 | 1.82m   | 946m     | 570.879m |
| C1-S10  | 1.723 | 4.661m | 954.575m | 3.563    | 1.667 | 3.144m | 975.287m | 974.774m | 1.645 | 10.286m | 791.903m | 501.881m |
| C3-S10  | 1.263 | 9.962m | 979.51m  | 3.53     | 1.265 | 6.285m | 990.15m  | 840.605m | 1.238 | 9.024m  | 895.979m | 429.561m |
| C5-S10  | 1.572 | 7.069m | 966.408m | 3.652    | 1.546 | 4.566m | 980.999m | 972.369m | 1.539 | 10.093m | 839.755m | 485.957m |
| C10-S10 | 1.334 | 6.711m | 944.942m | 6.251    | 1.313 | 4.053m | 976.57m  | 1.212    | 1.302 | 3.191m  | 975.263m | 505.946m |
| C3-S20  | 1.065 | 7.608m | 922.407m | 3.845    | 1.089 | 4.1m   | 973.541m | 840.8m   | 1.1   | 2.997m  | 979.976m | 353.092m |
| C3-S50  | 1.81  | 3.085m | 927.537m | 3.85     | 1.836 | 1.628m | 993m     | 1.02     | 1.798 | 1.7m    | 980.348m | 479.817m |

**Table S6.** LSV results obtained in this research in comparison with other related studies in room temperature.

| Electrocatalyst | Electrolyte | $\eta_{10}$ (mV) | $\eta_{100}$ (mV) | Tafel Slope (mV.dec <sup>-1</sup> ) | Ref.       |
|-----------------|-------------|------------------|-------------------|-------------------------------------|------------|
| Co-Ni           | 1M KOH      | 132              | -                 | 84.39                               | [1]        |
| Ni-Fe           | 1M KOH      | 142              | 239               | 133.3                               | [2]        |
| Ni-Co           | 1M KOH      | 86.7             | -                 | 69.8                                | [3]        |
| Ni-Cu           | 1M KOH      | 76               | 167               | 46                                  | [4]        |
| Mn-Co           | 1M KOH      | 100              | -                 | 65.4                                | [5]        |
| Ni-Mg-La        | 1M KOH      | 70               | -                 | 120.26                              | [6]        |
| Ni-Co-Mo        | 0.1M KOH    | 132              | -                 | 108                                 | [7]        |
| Co-Mo-Cu        | 6 M KOH     | 119              | -                 | 82                                  | [8]        |
| Ni-Cu-Fe        | 1M KOH      | 42               | -                 | 77                                  | [9]        |
| Ni-Co-Mn        | 1M KOH      | 81               | 214               | 118.73                              | This study |



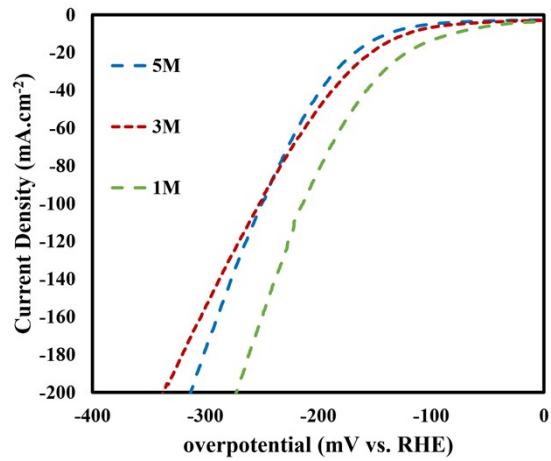

**Figure S9.** LSV curves of C3-S10 samples in different concentrations of KOH

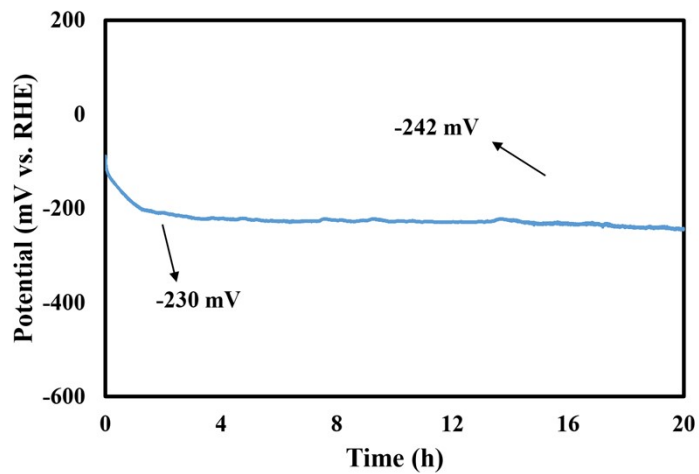

**Figure S10.** Long-term stability of C3-S10 in 5M KOH at 50 °c

## References

- [1] C. Cheng *et al.*, "High-efficiency bifunctional electrocatalyst based on 3D freestanding Cu foam in situ armored CoNi alloy nanosheet arrays for overall water splitting," *Journal of Power Sources*, vol. 427, pp. 184-193, 2019.
- [2] Z. Zhang, Y. Wu, and D. Zhang, "Potentiostatic electrodeposition of cost-effective and efficient Ni–Fe electrocatalysts on Ni foam for the alkaline hydrogen evolution reaction," *International Journal of Hydrogen Energy*, vol. 47, no. 3, pp. 1425-1434, 2022.
- [3] X. Zhang *et al.*, "3D hierarchical nanostructured Ni–Co alloy electrodes on porous nickel for hydrogen evolution reaction," *International Journal of Hydrogen Energy*, vol. 44, no. 57, pp. 29946-29955, 2019.
- [4] J. Niu *et al.*, "Ultrarapid synthesis Ni-Cu bifunctional electrocatalyst by self-etching electrodeposition for high-performance water splitting reaction," *Applied Surface Science*, vol. 561, p. 150030, 2021.
- [5] D. Cao *et al.*, "Amorphous Manganese–Cobalt Nanosheets as Efficient Catalysts for Hydrogen Evolution Reaction (HER)," *Catalysis Surveys from Asia*, vol. 25, no. 4, pp. 437-444, 2021.
- [6] W. Liu, W. Tan, H. He, and Y. Yang, "Electrodeposition of self-supported Ni–Mg–La electrocatalyst on Ni foam for efficient hydrogen evolution reaction," *Electrochimica Acta*, vol. 411, p. 140058, 2022.
- [7] D. Gao *et al.*, "Three-dimensional dendritic structures of NiCoMo as efficient electrocatalysts for the hydrogen evolution reaction," *ACS Applied Materials & Interfaces*, vol. 9, no. 27, pp. 22420-22431, 2017.
- [8] H. L. S. Santos, P. G. Corradini, M. Medina, and L. H. Mascaro, "Effect of copper addition on cobalt-molybdenum electrodeposited coatings for the hydrogen evolution reaction in alkaline medium," *International Journal of Hydrogen Energy*, vol. 45, no. 58, pp. 33586-33597, 2020.
- [9] Z. M. Kazemi, A. S. Rouhaghdam, G. B. Darband, M. Maleki, D. Han, and S. Shanmugam, "Ultra-fast electrochemical preparation of Ni-Cu-Fe nano-micro dendrite as a highly active and stable electrocatalyst for overall water splitting," *Electrochimica Acta*, vol. 456, p. 142468, 2023.
